# Supplementary material
Source: PubMed Central journal article supplement (PMC8297532)
Supplement: jb00230-21_supp_1_seq5.pdf [file jb00230-21_supp_1_seq5.pdf]

## **Supplemental Materials for:**

### **Effect of vancomycin on cytoplasmic peptidoglycan intermediates and van operon mRNA levels in VanA-type vancomycin resistant *Enterococcus faecium***

Shivani Gargvanshi<sup>1</sup>, Harika Vemula<sup>1,2</sup>, and William G. Gutheil<sup>1\*</sup>

<sup>1</sup>Division of Pharmacology and Pharmaceutical Sciences, School of Pharmacy, University of Missouri-Kansas City, Kansas City, Missouri 64108, USA.

<sup>2</sup>Present address: ThermoFisher Scientific, Hunt Valley, Maryland, 21031.

\*Corresponding author: William G. Gutheil  
E- mail: gutheilw@umkc.edu.

## Supplemental Results

**LC-MS/MS method development.** Table S1 shows the optimized parameters for LC-MS/MS detection of alternative pathway intermediates in VREfm.

**Table S1** Summary of optimized parameters and sensitivities for negative mode IP-LC-MS/MS detection of UDP-linked intermediates in VRE<sup>a,b</sup>.

|                               | $t_r$ (min) | Q1     | Q3    | DP (V) | EP (V) | CE (V) | AU/pmol | LOD (fmol) <sup>c</sup> |
|-------------------------------|-------------|--------|-------|--------|--------|--------|---------|-------------------------|
| UDP-Penta                     | 12.1        | 1148.3 | 403.0 | -140   | -10    | -60    | 3970    | 80                      |
| UDP-Penta-D-iAsp <sup>d</sup> | 17.5        | 1263.3 | 403.0 | -140   | -10    | -60    | 3970    | 80                      |
| UDP-Pentadepsi                | 15.5        | 1149.3 | 403.0 | -120   | -10    | -62    | 4120    | 70                      |
| UDP-Pentadepsi-D-iAsp         | 20.5        | 1264.3 | 403.0 | -100   | -8     | -45    | 2450    | 180                     |
| UDP-Tetra                     | 11.0        | 1077.3 | 403.0 | -125   | -12    | -56    | 3550    | 89                      |
| UDP-Tetra-D-iAsp <sup>e</sup> | 13.10       | 1192.3 | 403.0 | -125   | -12    | -56    | 3550    | 89                      |

<sup>a</sup>  $t_r$ , chromatographic retention time; Q1, quadrupole 1 m/z for analyte precursor ion; Q3, quadrupole 3 m/z for analyte fragment ion; AU, area units; CE, collision energy; DP, declustering potential; EP, entrance potential; LOD, lower limit of detection;  $t_r$ , retention time.

<sup>b</sup> For all ions: Collision cell entrance potential = -8 V; Collisionally activated dissociation gas level, arbitrary units = medium; Source temperature = 600 °C; Curtain gas setting = 30 psi; GS1 = 70 psi; GS2 = 20 psi.

<sup>c</sup> Lower limits of quantification (LLOQs) were 3.3x the LOD for a particular analyte.

<sup>d</sup> UDP-Penta-D-iAsp MS/MS detection values were from UDP-Penta.

<sup>e</sup> UDP-Tetra-D-iAsp MS/MS detection values were from UDP-Tetra.

Figure S1 shows the corresponding LC-MS/MS chromatograms for these alternative pathway intermediates, with UDP-Penta included for reference.

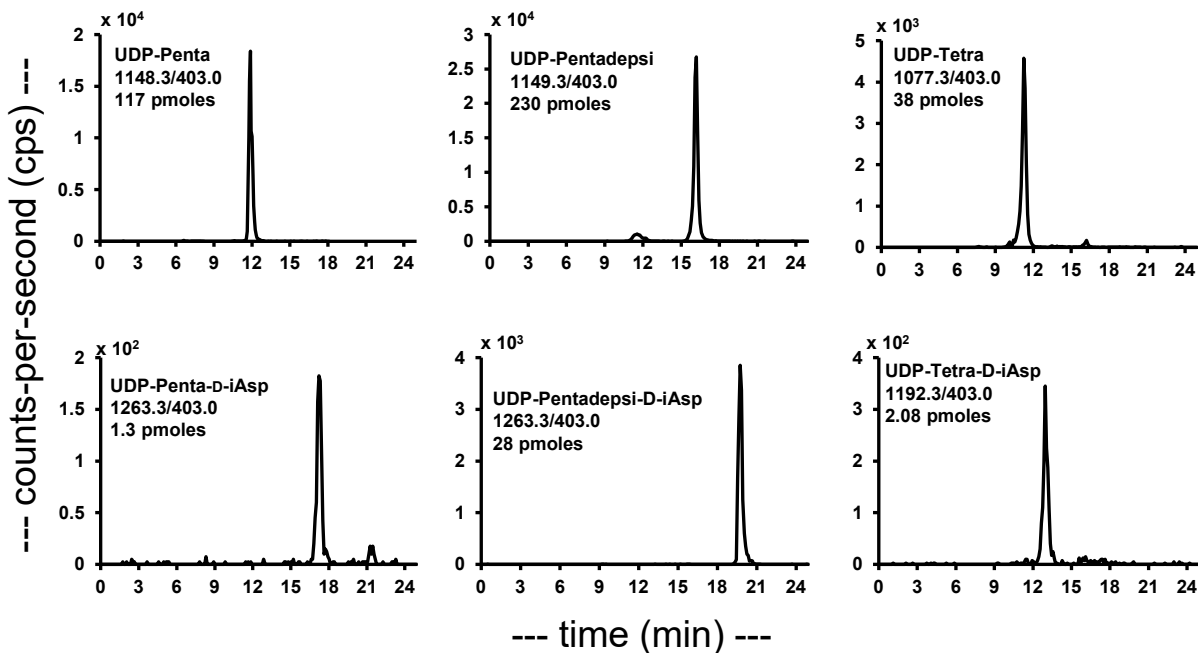

**Figure S1.** LC-MS/MS chromatograms of VanA type VRE specific cytoplasmic UDP cell wall intermediates. UDP-Penta included for reference.

**Detailed summary of survey of vancomycin effects on CWB intermediates in *E. faecium* results (Table 1).**

VSEfm-Vm v VREfm-Vm: The UDP-linked PG pathway intermediate profiles of VSEfm-Vm and VREfm-Vm have similar (+/-3-fold) levels of normal (i.e. not VanA resistance related) UDP-linked pathway intermediates. UDP-Sum (the sum of all UDP-linked intermediate concentrations) is also similar in these control samples. Most PG related amines included in this study also show similar levels between VSEfm-Vm and VREfm-Vm, with the exception of D-Ala-D-Ala, which is notably lower in VREfm-Vm than in VSEfm-Vm. MRSA-Vm shows higher amino acid levels than VSEfm-Vm and VREfm-Vm.

MRSA+1.5 v VSEfm+1.5: After vancomycin treatment for 90 minutes (1.5 h, +1.5), substantial changes in metabolite levels are apparent. As reported previously (28), MRSA+1.5 shows a dramatic increase in total UDP-linked metabolites (UDP-Sum) – particularly of the terminal cytoplasmic intermediate UDP-Penta – due to continued synthesis of UDP-linked intermediates and their accumulation. VSEfm+1.5 in contrast shows a decrease in early UDP-linked intermediates, and only a relatively modest increase in UDP-Penta and UDP-Sum, indicating that entry into the pathway is restricted in VSE in the presence of vancomycin, and also possibly that turnover of pathway intermediates continues at a reduced rate. Amines levels are also decreased in VSEfm+1.5.

VREfm-Vm v VREfm+1.5: In VREfm+1.5, most normal intermediate levels are close to their VREfm-Vm values, except UDP-Penta, which is modestly higher. Substantially increased levels of VanA-type resistance UDP intermediates are apparent in VREfm+1.5 – particularly UDP-Pentadepsi, UDP-Tetra, and D-Ala-D-Lac, which are the key intermediates for vancomycin resistance in VanA-type VREfm (Fig. 1). UDP-Pentadepsi, synthesized from D-Ala-D-Lac, is the replacement for UDP-Penta in VanA-type resistance, and UDP-Tetra is the degradation product of UDP-Penta in VanA-type resistance. D-Ala-D-Ala is decreased modestly.

VREfm+18 v VREfm+1.5 & VREfm-Vm: After extended (18 hr) vancomycin exposure (VREfm+18), the normal UDP-linked metabolite levels have partially returned towards VREfm-Vm levels compared to VREfm+1.5 with the exception of UDP-Penta, which is lower in VREfm+18 than in either the VREfm-Vm or VREfm+1.5. D-Ala-D-Ala levels are also low in VREfm+18. The unique VanA-type resistance UDP-linked intermediate levels have also dropped from their 90 min exposure levels. UDP-Sum is nearly the same in VFRfm+18 as in VREfm-vanc. These data indicate that, upon vancomycin exposure, VREfm shows an initial accumulation of both normal and alternative UDP-linked pathway intermediates, followed by a partial return of normal intermediates to their -Vm levels and a drop in the alternative intermediate levels from the higher values observed in VREfm+1.5. The level of the D-isoAsp containing intermediates is small and only detectible in vancomycin treated VREfm samples and appear unlikely to play a significant role in PG biosynthesis in VREfm.

**Time course results from both VREfm and VSEfm.** Time course results from both VREfm and VSEfm were plotted on a “semi-square root” x-axis to expand early time course changes.

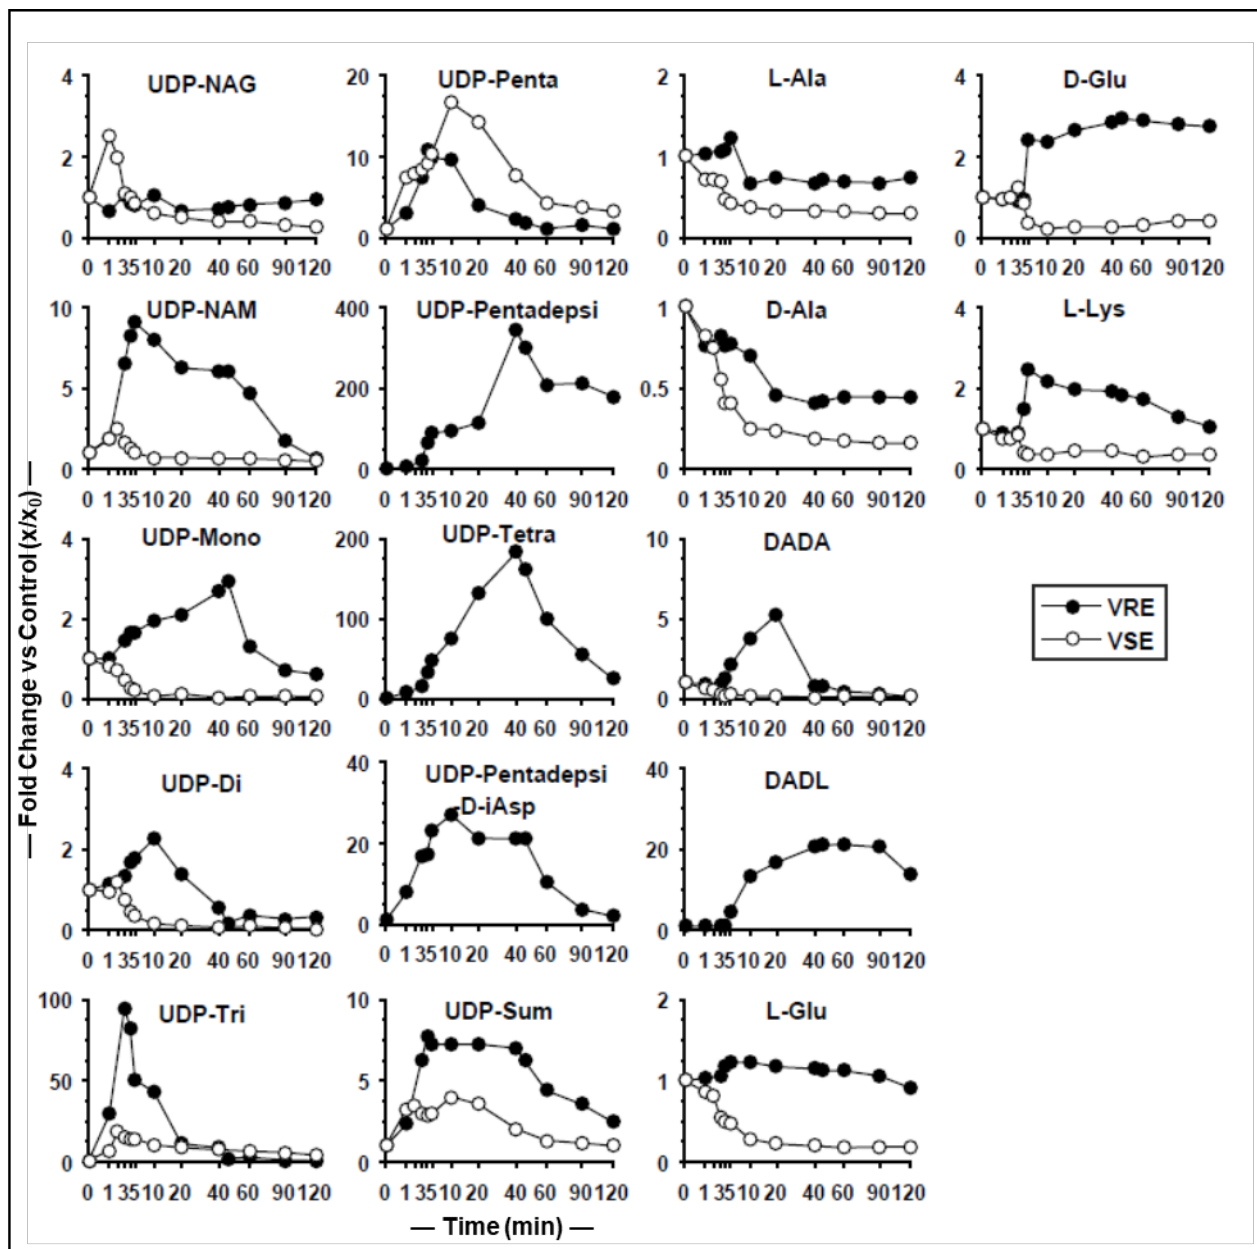

**Figure S2.** Time courses of VREfm PG intermediates (same data as in main text Fig. 2), and VSEfm PG intermediates plotted as fold changes vs their  $t_0$  values ( $t_0$  values in Table 1). The x-axis is plotted in a semi-square root form to expand early time points for easier visualization.

## Supplemental Materials and Methods

Primers used in this study for RT-qPCR (Table S2).

**Table S2** Primers used for RT-qPCR of VanA mRNA transcripts.

| Gene | Primer | Sequence (5' – 3')   |
|------|--------|----------------------|
| VanH | F      | CGATAATTAACGCCAACGTG |
|      | R      | ATTTACACCCGGCTCTCTTC |
| VanA | F      | TAATTGAGCAGGCTGTTTCG |
|      | R      | TACTGCAGCCTGATTTGGTC |
| VanX | F      | GATTGCTTCTATGGGACGGT |
|      | R      | CAGTTCGGTCAATATTGGGA |
| VanY | F      | ATGCTTGGAATACGGGTTTC |
|      | R      | CCATATATTCCTCGAGAACG |
| VanZ | F      | TTGGAGCGACAGACATAACA |
|      | R      | TGATTCATATGCTTATTGCT |
| 16S  | F      | GTCAGCTCGTGTCTGAGAT  |
|      | R      | GAGTGCCCAACTGAATGATG |

F – Forward primer, R – Reverse primer.
